# Supplementary material
Source: PubMed Central journal article supplement (PMC11619719)
Supplement: NIHMS2037013-supplement-1.pdf [file NIHMS2037013-supplement-1.pdf]

**Supplementary Table 1.** Associations between the velocity pulsatility index (VPI) with measures of SFA plaque burden.

| Variable                         | Independent Variable           | N  | BETA     | SE      | R <sup>2</sup> | Adjusted R <sup>2</sup> | P-value |
|----------------------------------|--------------------------------|----|----------|---------|----------------|-------------------------|---------|
| <b>Pooled Data</b>               |                                |    |          |         |                |                         |         |
| VPI at proximal site             | SFA total volume, cc           | 70 | 60.833   | 179.172 | 0.002          | -0.013                  | 0.74    |
|                                  | SFA wall volume, cc            | 70 | 275.648  | 251.106 | 0.017          | 0.003                   | 0.28    |
|                                  | SFA lumen volume, cc           | 70 | -368.77  | 389.016 | 0.013          | -0.002                  | 0.35    |
|                                  | 24Mo Δ of SFA total volume, cc | 38 | 124.843  | 373.776 | 0.003          | -0.025                  | 0.74    |
|                                  | 24Mo Δ of SFA wall volume, cc  | 38 | 1115.102 | 659.675 | 0.074          | 0.048                   | 0.1     |
|                                  | 24Mo Δ of SFA lumen volume, cc | 38 | -634.241 | 645.027 | 0.026          | -0.001                  | 0.33    |
| VPI at distal site               | SFA total volume, cc           | 69 | 4.369    | 3.734   | 0.02           | 0.005                   | 0.25    |
|                                  | SFA wall volume, cc            | 69 | 1.94     | 5.306   | 0.002          | -0.013                  | 0.72    |
|                                  | SFA lumen volume, cc           | 69 | 16.285   | 8.034   | 0.058          | 0.044                   | 0.047   |
|                                  | 24Mo Δ of SFA total volume, cc | 37 | 7.701    | 6.035   | 0.045          | 0.017                   | 0.21    |
|                                  | 24Mo Δ of SFA wall volume, cc  | 37 | -1.494   | 11.242  | 0.001          | -0.028                  | 0.90    |
|                                  | 24Mo Δ of SFA lumen volume, cc | 37 | 24.866   | 9.945   | 0.152          | 0.127                   | 0.017   |
| <b>Diabetic PAD Patients</b>     |                                |    |          |         |                |                         |         |
| VPI at proximal site             | SFA total volume, cc           | 27 | 3.226    | 4.204   | 0.023          | -0.016                  | 0.45    |
|                                  | SFA wall volume, cc            | 27 | 0.728    | 5.89    | 0.001          | -0.039                  | 0.90    |
|                                  | SFA lumen volume, cc           | 27 | 12.101   | 8.43    | 0.076          | 0.039                   | 0.16    |
|                                  | 24Mo Δ of SFA total volume, cc | 14 | 5.554    | 6.583   | 0.056          | -0.023                  | 0.42    |
|                                  | 24Mo Δ of SFA wall volume, cc  | 14 | -1.277   | 13.066  | 0.001          | -0.083                  | 0.92    |
|                                  | 24Mo Δ of SFA lumen volume, cc | 14 | 20.96    | 11.25   | 0.224          | 0.16                    | 0.09    |
| VPI at distal site               | SFA total volume, cc           | 27 | 10.391   | 5.183   | 0.139          | 0.104                   | 0.06    |
|                                  | SFA wall volume, cc            | 27 | 6.808    | 7.615   | 0.031          | -0.008                  | 0.38    |
|                                  | SFA lumen volume, cc           | 27 | 29.095   | 9.937   | 0.255          | 0.226                   | 0.007   |
|                                  | 24Mo Δ of SFA total volume, cc | 14 | 16.6     | 8.345   | 0.248          | 0.185                   | 0.07    |
|                                  | 24Mo Δ of SFA wall volume, cc  | 14 | 17.531   | 17.863  | 0.074          | -0.003                  | 0.35    |
|                                  | 24Mo Δ of SFA lumen volume, cc | 14 | 42.263   | 13.428  | 0.452          | 0.407                   | 0.008   |
| <b>Non-Diabetic PAD Patients</b> |                                |    |          |         |                |                         |         |
| VPI at                           | SFA total volume, cc           | 43 | 120.766  | 304.942 | 0.004          | -0.021                  | 0.69    |

|                    |                                       |    |           |          |       |        |      |
|--------------------|---------------------------------------|----|-----------|----------|-------|--------|------|
| proximal site      | SFA wall volume, cc                   | 43 | 528.924   | 431.074  | 0.035 | 0.012  | 0.23 |
|                    | SFA lumen volume, cc                  | 43 | -706.134  | 688.34   | 0.025 | 0.001  | 0.31 |
|                    | 24Mo $\Delta$ of SFA total volume, cc | 24 | 407.817   | 708.832  | 0.015 | -0.03  | 0.57 |
|                    | 24Mo $\Delta$ of SFA wall volume, cc  | 24 | 2222.527  | 1101.121 | 0.156 | 0.118  | 0.06 |
|                    | 24Mo $\Delta$ of SFA lumen volume, cc | 24 | -1050.943 | 1163.699 | 0.036 | -0.008 | 0.38 |
| VPI at distal site | SFA total volume, cc                  | 42 | -1.574    | 4.814    | 0.003 | -0.022 | 0.75 |
|                    | SFA wall volume, cc                   | 42 | -4.143    | 6.854    | 0.009 | -0.016 | 0.55 |
|                    | SFA lumen volume, cc                  | 42 | 2.363     | 11.102   | 0.001 | -0.024 | 0.83 |
|                    | 24Mo $\Delta$ of SFA total volume, cc | 23 | -8.457    | 8.198    | 0.048 | 0.003  | 0.31 |
|                    | 24Mo $\Delta$ of SFA wall volume, cc  | 23 | -23.387   | 12.843   | 0.136 | 0.095  | 0.08 |
|                    | 24Mo $\Delta$ of SFA lumen volume, cc | 23 | 0.418     | 13.997   | 0     | -0.048 | 0.97 |

VPI = Maximum velocity - Minimum velocity / Mean velocity; BETA=parameters estimate; SE = standard error; Mo: month; SFA: superficial femoral artery; PAD: peripheral artery disease; 24-Mo  $\Delta$ : 24-months difference.
